# Supplementary material for: Combination of noncovalent conformational locks and side chain engineering to tune the crystallinity of nonfullerene acceptors for high-performance P3HT based organic solar cells
Source: Royal Society of Chemistry journal article supplement (doi:10.1039/c8qm00461g), 2018-10-15
Supplement: c8qm00461g1.pdf [file c8qm00461g1.pdf]

Electronic Supplementary Information for:

**Combination of Noncovalent Conformational Locks and Side Chain Engineering to Tune Crystallinity of Nonfullerene Acceptors for P3HT based Organic Solar Cells**

Pan Ye,<sup>a</sup> Yusheng Chen,<sup>a</sup> Jianfei Wu,<sup>ab</sup> Xiaoxi Wu,<sup>a</sup> Yunxiao Xu,<sup>ac</sup> Zijie Li,<sup>a</sup> Shikai Hong<sup>a</sup>, Ming Sun, <sup>\*d</sup> Aidong Peng<sup>\*a</sup>, Hui Huang<sup>\*a</sup>.

*<sup>a</sup> College of Materials Science and Opto-Electronic Technology and Key Laboratory of Vacuum Physics University of Chinese Academy of Sciences, Beijing 100048, P. R. China*

*<sup>b</sup> Beijing Key Laboratory of Function Materials for Molecular & Structure Construction School of Materials Science and Engineering University of Science and Technology Beijing, Beijing 100083, P. R. China*

*<sup>c</sup> Key Laboratory of Flexible Electronics (KLOFE) & Institute of Advanced Materials (IAM), Jiangsu National Synergetic Innovation Center for Advanced Materials (SICAM), Nanjing Tech University, 30 South Puzhu Road, Nanjing 211816, Jiangsu, P. R. China*

*<sup>d</sup> School of Electronic and Optical Engineering, Nanjing University of Science and Technology, Nanjing, Jiangsu 210094, P. R. China*

## 1. Materials.

All chemicals were purchased from commercial sources and employed without further purification unless indicated otherwise. All reactions were carried out under nitrogen atmosphere. Compound **1** and **2** were prepared according to literature procedure.<sup>1, 2</sup> Toluene was freshly distilled from sodium, and chloroform was freshly distilled from CaCl<sub>2</sub>.

## 2. Experimental Section.

### Materials synthesis

All the synthetic routes were shown as follow:

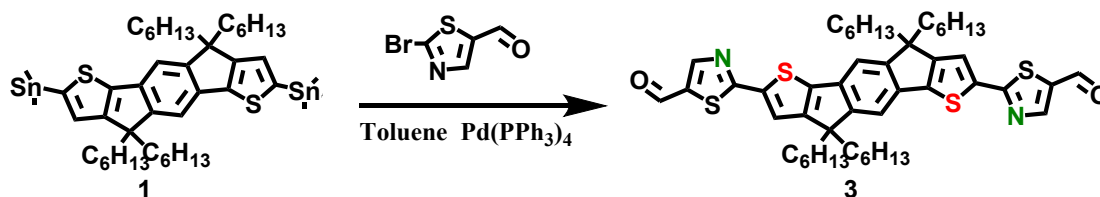

**Synthesis of compound 3:** Compound **1** (300.0 mg, 0.320 mmol) and 2-bromothiazole-5-carbaldehyde (186.0 mg, 0.97 mmol), and Pd(PPh<sub>3</sub>)<sub>4</sub> (20.0 mg, 0.017 mmol) were dissolved in dry toluene (30 mL) under nitrogen. The mixed system was heated at 110 °C for 24 h. Then the mixed system was poured into CH<sub>3</sub>OH (100 mL) to afford a red solid. Afterwards, the solid was collected and dried in air. Then, the solid was purified by column chromatography on silica gel using petroleum ether/CH<sub>2</sub>Cl<sub>2</sub> (1:1,v/v) as an eluent, affording a red solid (~100 mg, 40%). <sup>1</sup>H NMR (400 MHz, CDCl<sub>3</sub>): δ 10.02 (s, 2H), 8.33 (s, 2H), 7.56 (s, 2H), 7.37 (s, 2H), 2.03 (m, 4H), 1.91 (m, 4H), 1.2 (m, 32H), 0.75 (m, 12H). MS (MALDI-TOF): calculated for C<sub>48</sub>H<sub>60</sub>N<sub>2</sub>O<sub>2</sub>S<sub>4</sub>, 824.3; found: 824.4.

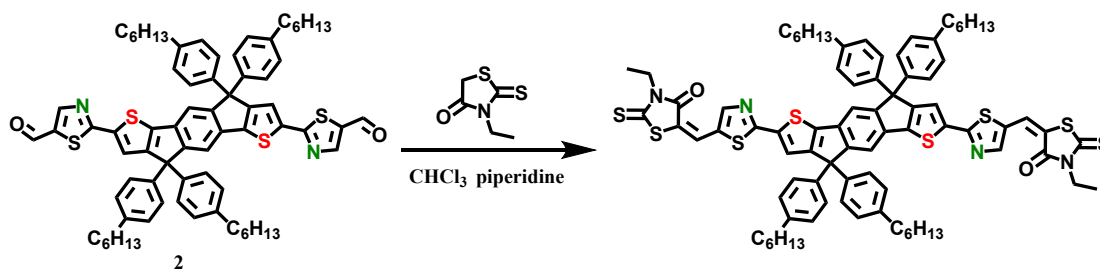

**Synthesis of P-IDTzR:** Compound **2** (140.0 mg, 0.12 mmol) and 3-ethylrhodanine (116.0 mg, 0.72 mmol) were dissolved in dry  $\text{CHCl}_3$  (20 mL) under nitrogen. And the piperidine (0.1 mL) was added to the mixed system dropwise. The mixed system was heated at  $65\text{ }^\circ\text{C}$  for 15 h and was cooled to room temperature. Afterwards, the mixed system was poured into  $\text{CH}_3\text{OH}$  (100 mL). After filtration, the solid was purified by column chromatography on silica gel using petroleum ether/ $\text{CH}_2\text{Cl}_2$  (1:2, v/v) as an eluent, affording a purplish red solid (~60 mg, 37%).  $^1\text{H}$  NMR (400 MHz,  $\text{CDCl}_3$ ):  $\delta$  7.96 (s, 2H), 7.85 (s, 2H), 7.52 (s, 2H), 7.50 (s, 2H), 7.19-7.16 (m, 8H), 7.11-7.08 (m, 8H), 4.17 (m, 4H), 2.56 (m, 6H), 1.29-1.24 (m, 40H), 0.85 (m, 12H).  $^{13}\text{C}$  NMR(100 MHz,  $\text{CDCl}_3$ ):  $\delta$  191.23, 167.00, 166.91, 157.64, 154.53, 149.10, 145.94, 142.15, 140.93, 138.99, 135.68, 132.45, 128.71, 127.85, 124.31, 123.56, 121.97, 118.37, 63.18, 40.17, 35.65, 31.79, 31.42, 29.22, 22.67, 14.18, 12.35. MS (MALDI-TOF): calculated for  $\text{C}_{82}\text{H}_{86}\text{N}_4\text{O}_2\text{S}_8$ , 1416.1; found: 1416.0. Elemental analysis Calc. C, 69.55%; H, 6.12%; N, 3.96%. Found: C, 68.74%; H, 6.19%; N, 3.81%.

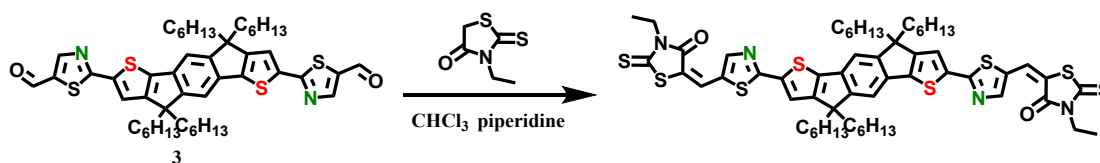

**Synthesis of H-IDTzR:** The synthetic route of H-IDTzR is the same as that of P-IDTzR. Compound **3** (140.0 mg, 0.170 mmol), 3-ethylrhodanine (161.0 mg, 1 mmol) and color of H-IDTzR is a dark solid (~60 mg, 32%). <sup>1</sup>H NMR (400 MHz, CDCl<sub>3</sub>): δ 8.02 (s, 2H), 7.90 (s, 2H), 7.53 (s, 2H), 7.36 (s, 2H), 4.19 (d, 4H), 2.10-1.99 (m, 4H), 1.97-1.87(m, 4H), 1.29 (m, 6H), 1.17-1.05 (m, 24H), 0.95-0.78(m, 8H), 0.76(m, 12H). <sup>13</sup>C NMR(100 MHz, CDCl<sub>3</sub>): δ191.29, 165.51, 166.95, 156.90, 154.45, 149.62, 146.93, 138.01, 136.27, 132.17, 123.27, 122.94, 122.15, 114.25, 54.48, 40.19, 39.17, 31.66, 29.71, 24.31, 22.66, 14.13, 12.38. MS (MALDI-TOF): calculated for C<sub>58</sub>H<sub>70</sub>N<sub>4</sub>O<sub>2</sub>S<sub>8</sub>, 1111.7; found: 1111.5. Elemental analysis Calc. C, 62.66%; H, 6.35%; N, 5.04%. Found: C, 62.37%; H, 6.42%; N, 4.96%.

## Measurements and Instruments

The <sup>1</sup>H and <sup>13</sup>C NMR spectra were tested on a JEOL-ECZ400S. Mass spectra were performed on a Bruker Daltonics Biflex III MALDI-TOF Analyzer. Element analysis was recorded on a Flash EA 1112 elemental analyzer. Ultraviolet-vis spectrophotometer spectra were carried out on a Perkin Elmer Lambda 20 UV/Vis Spectrophotometer. Thermogravimetric analyzer were measured on a Q50 at a heating rate of 10 °C·min<sup>-1</sup> under a nitrogen atmosphere. Photoluminescence spectra were conducted on an excitation of a laser beam using a Renishaw RM 3000 Micro-Raman/Photoluminescence system, all films samples were spin-casted on quartz glass substrates. Cyclic voltammetry measurements were proceeded on a CHI600E electrochemical workstation with a potential scan rate of 0.05 mV·s<sup>-1</sup> under nitrogen in 0.1 M tetrabutylammonium hexafluorophosphate (Bu<sub>4</sub>NPF<sub>6</sub>) acetonitrile solution. The

geometrical conformation of H-IDTzR and P-IDTzR molecules were optimized by density functional theory (DFT) calculation. All film samples of AFM were spin-casted on ITO glass substrates, and AFM images were obtained by NTEGRA Prima in the tapping mode. TEM images were performed by HT7700Ex instrument at 110 kV accelerating voltage.

### **Device fabrication and characterization**

The OPV devices were fabricated with an inverted structure of Glass/ITO/ZnO/P3HT:acceptor/MoO<sub>3</sub>/Ag. Patterned indium tin oxide (ITO) glass substrates were cleaned in an ultrasonic bath with detergent, deionized water, acetone and isopropanol, dried in an oven at 80 °C overnight and treated in an ultraviolet ozone for 30 min. ZnO (25 μL) precursor solution was then spin-coated onto the pre-cleaned ITO glass (4500 rpm, 40 s), and baked at 200 °C for 30 min. The active layer of P3HT:acceptor were processed in different conditions at concentration of 12 mg/mL. The optimized active layer thickness was ca.100 nm. After thermal annealing under different temperature, thin films were transferred into a vacuum evaporator connected to the glove box. Finally, about 10 nm MoO<sub>3</sub> and 100 nm Ag were deposited onto the active layer sequentially by thermal evaporation at a vacuum level of 10<sup>-5</sup> Pa. The current density-voltage (*J-V*) characterizations were recorded under air mass 1.5G (100 Mw·cm<sup>-2</sup>) using a Newport solar simulator. Besides, the incident photon to converted current efficiency (IPCE) spectrum was measured using Newport IPCE system.

### **Mobility measurements**

The blend films charge transport mobility was extracted by fitting the current density–voltage curves using space charge limited current (SCLC). The devices structure of ITO/PEDOT:PSS/active layer/MoO<sub>3</sub>/Ag for holes mobility and ITO/Al/active layer/Al for electrons mobility. The  $J$ – $V$  curves of the devices were plotted as  $J^{0.5}$  versus  $V$  using Eq.  $J = 9\varepsilon_0\varepsilon_r\mu_h(\mu_e)V^2/8L^3$  for holes and electrons, where  $J$  is current density,  $L$  is film thickness of active layer,  $\mu_e$  is electron mobility,  $\mu_h$  is hole mobility,  $\varepsilon_r$  is relative dielectric constant of the transport medium, and  $\varepsilon_0$  is permittivity of free space.  $V = V_{appl} - V_{bi}$ ,  $V$  is the applied voltage,  $V_{bi}$  is the offset voltage (for hole-only diodes and electron-only diodes,  $V_{bi}$  are all 0.4 V).

### 3. Tables.

**Table S1.** Photovoltaic performance of P3HT:P-IDTzR based OSCs with a ratio of 1:0.8 under illumination of AM 1.5 G, 100 mW·cm<sup>-2</sup>.

| Solvent | PCE (%) | $V_{OC}$ (V) | $J_{SC}$ (mA·cm <sup>-2</sup> ) | FF   |
|---------|---------|--------------|---------------------------------|------|
| CF      | 4.15    | 1.00         | 7.81                            | 53.1 |
| CB      | 3.80    | 0.99         | 6.47                            | 59.3 |

**Table S2.** Photovoltaic performance of P3HT:P-IDTzR based OSCs with a different D:A ratio under illumination of AM 1.5 G, 100 mW·cm<sup>-2</sup>.

| D:A   | PCE (%) | $V_{OC}$ (V) | $J_{SC}$ (mA·cm <sup>-2</sup> ) | FF   |
|-------|---------|--------------|---------------------------------|------|
| 1:1.3 | 4.21    | 1.00         | 8.05                            | 52.3 |
| 1:1   | 4.49    | 1.01         | 8.42                            | 52.8 |
| 1:0.8 | 4.15    | 1.00         | 7.81                            | 53.1 |

**Table S3.** Photovoltaic performance of P3HT:P-IDTzR based OSCs with different thermal annealing (TA) temperature under illumination of AM 1.5 G, 100 mW cm<sup>-2</sup>.

| TA    | PCE (%) | $V_{OC}$ (V) | $J_{SC}$ (mA·cm <sup>-2</sup> ) | FF   |
|-------|---------|--------------|---------------------------------|------|
| 100°C | 4.57    | 1.01         | 9.10                            | 49.8 |
| 130°C | 4.88    | 1.02         | 8.89                            | 53.8 |
| 160°C | 4.49    | 1.01         | 8.42                            | 52.8 |

#### 4. Figures.

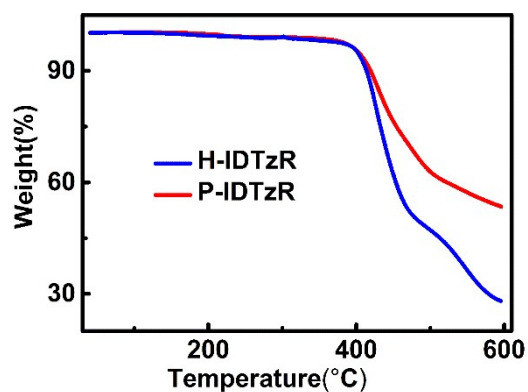

**Fig. S1.** TGA curves for H-IDTzR and P-IDTzR.

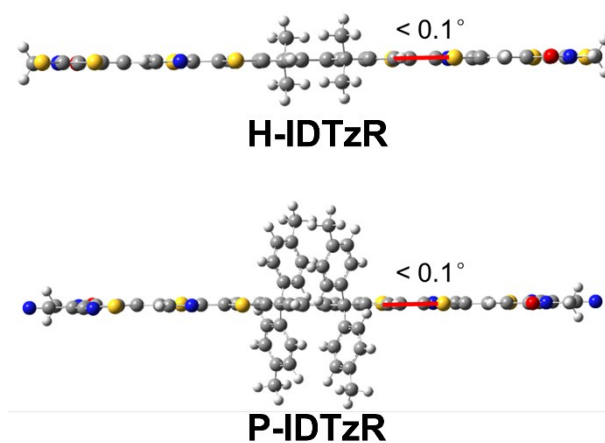

**Fig. S2.** Side view of optimized molecular geometries for H-IDTzR and P-IDTzR.

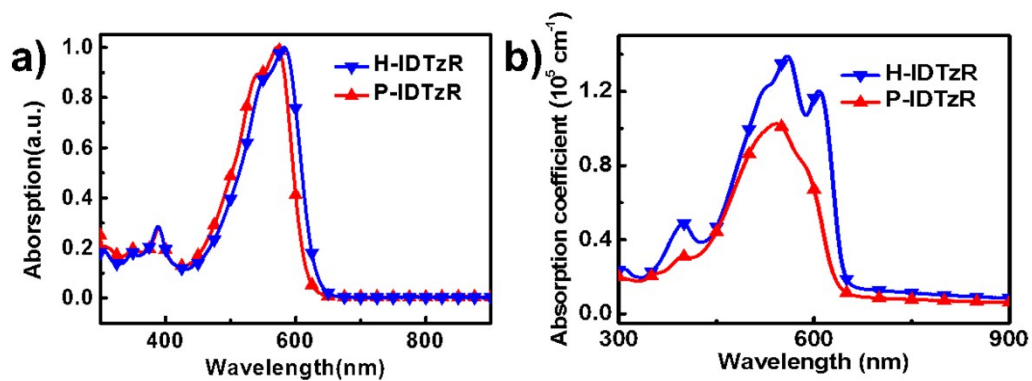

**Fig. S3.** a) UV-Vis absorption spectra of the solution for H-IDTzR and P-IDTzR. b) UV-Vis absorption spectra of blend film for H-IDTzR and P-IDTzR.

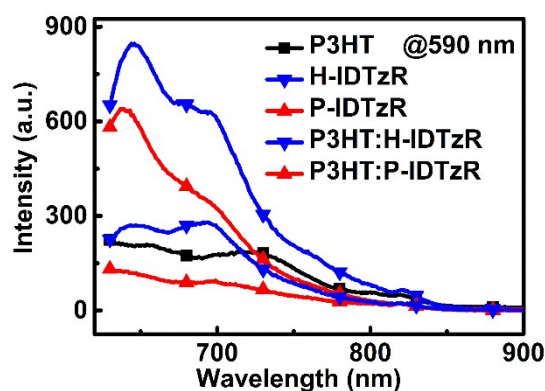

**Fig. S4.** Photoluminescence spectra of P3HT, H-IDTzR and P-IDTzR pristine films and corresponding blended films excited at 590 nm, respectively.

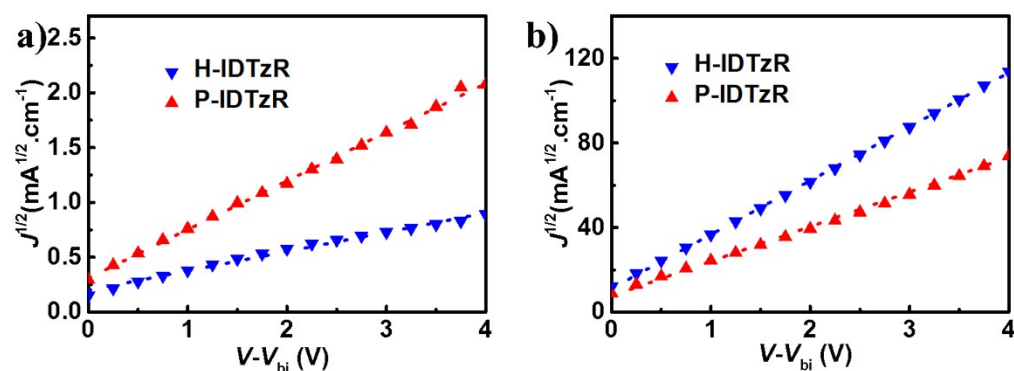

**Fig. S5.** a) Typical current density-applied voltage lines for electron-only diodes. b) Typical current density-applied voltage lines for hole-only diodes.



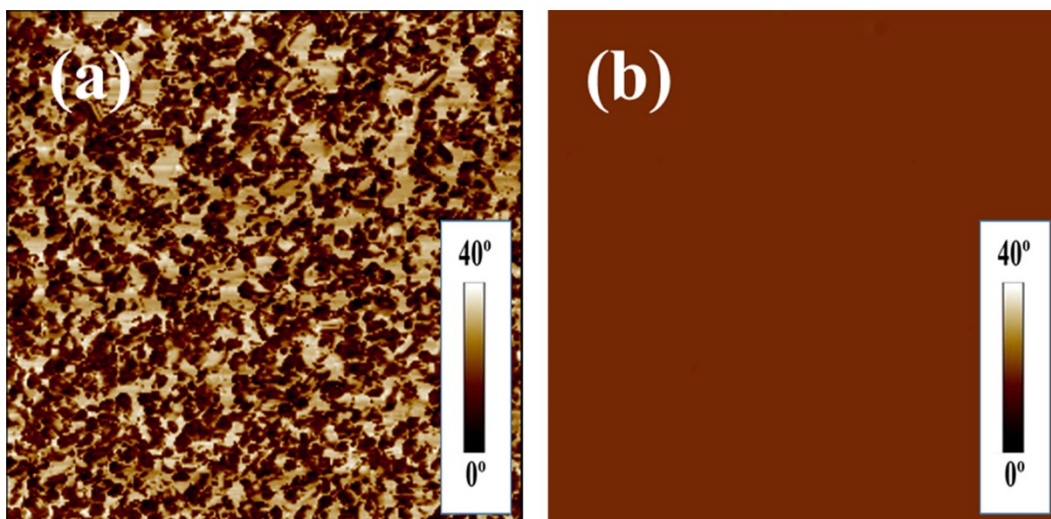

**Fig. S6.** AFM phase images of blended films of P3HT:H-IDTzR (a) and P3HT:P-IDTzR (b).

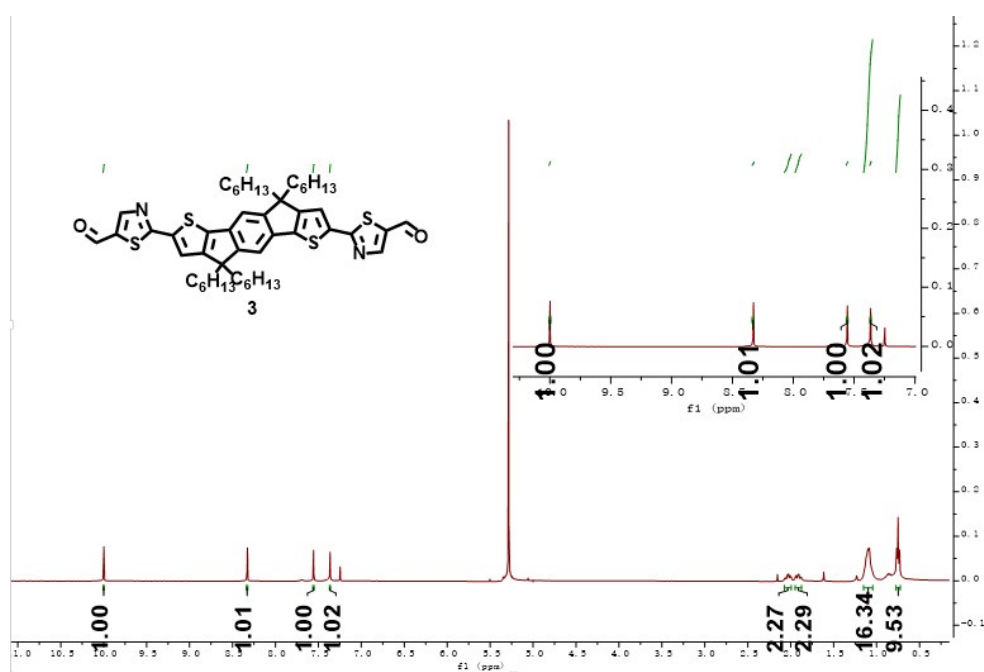

**Fig. S7.**  $^1\text{H}$  NMR (400 MHz,  $\text{CDCl}_3$ ) spectra of compound **3**.

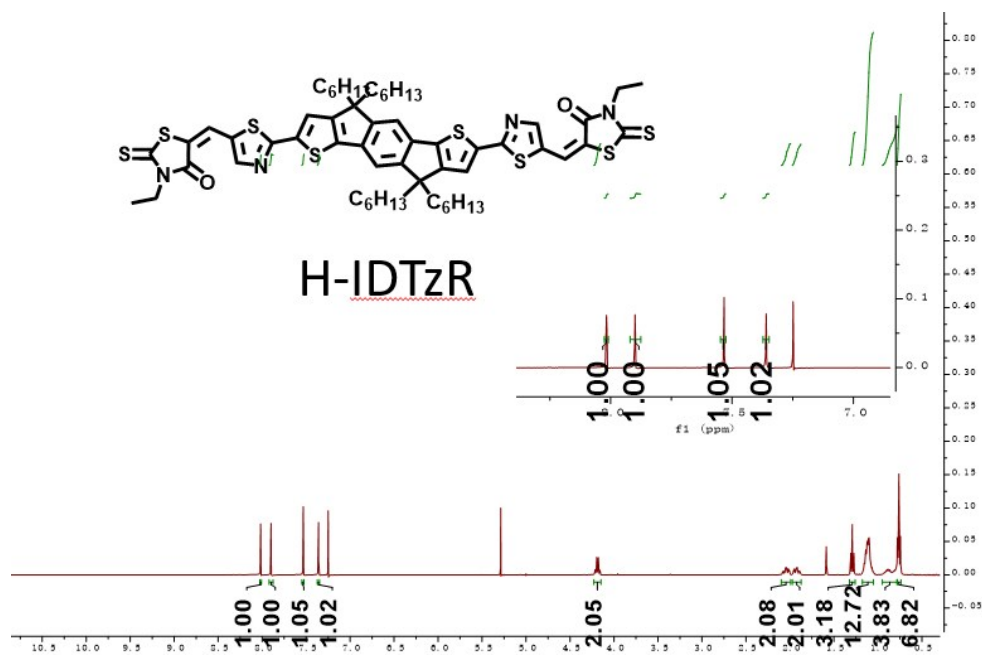

**Fig. S8.**  $^1\text{H}$  NMR (400 MHz,  $\text{CDCl}_3$ ) spectra of H-IDTzR.

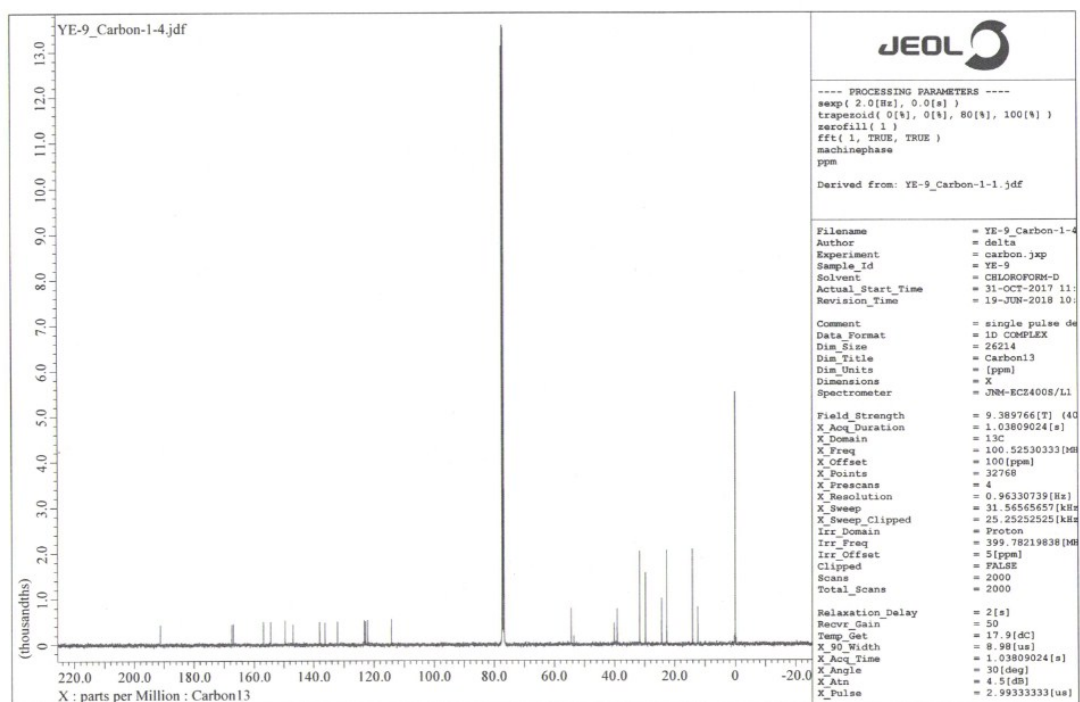

**Fig. S9.**  $^{13}\text{C}$  NMR (100 MHz,  $\text{CDCl}_3$ ) spectra of H-IDTzR.

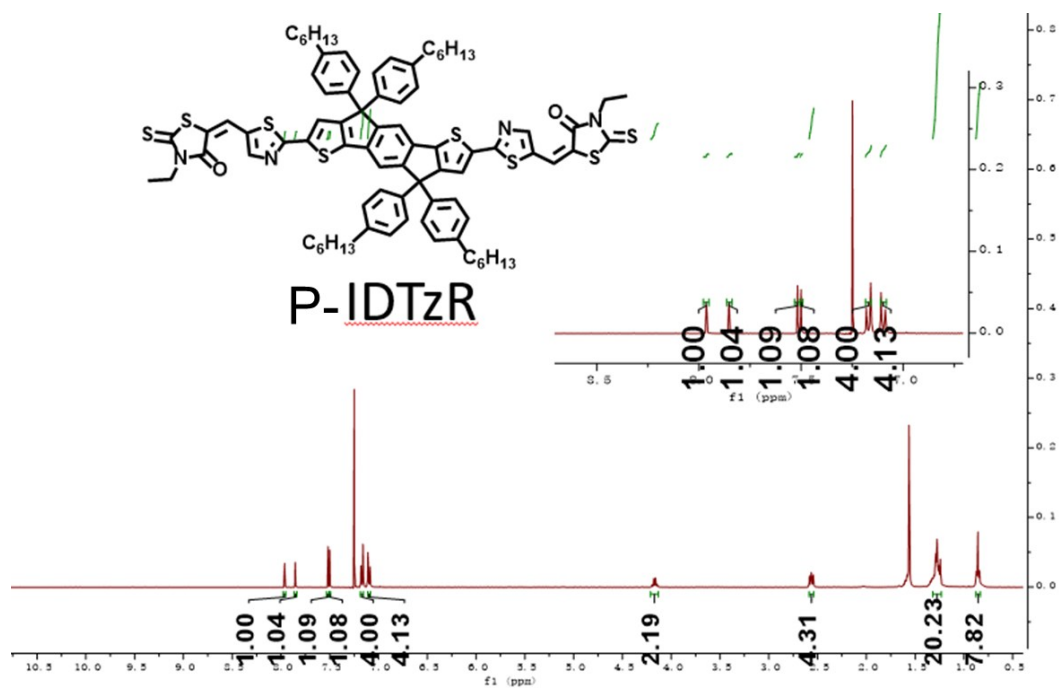

**Fig. S10.**  $^1\text{H}$  NMR (400 MHz,  $\text{CDCl}_3$ ) spectra of compound P-IDTzR.

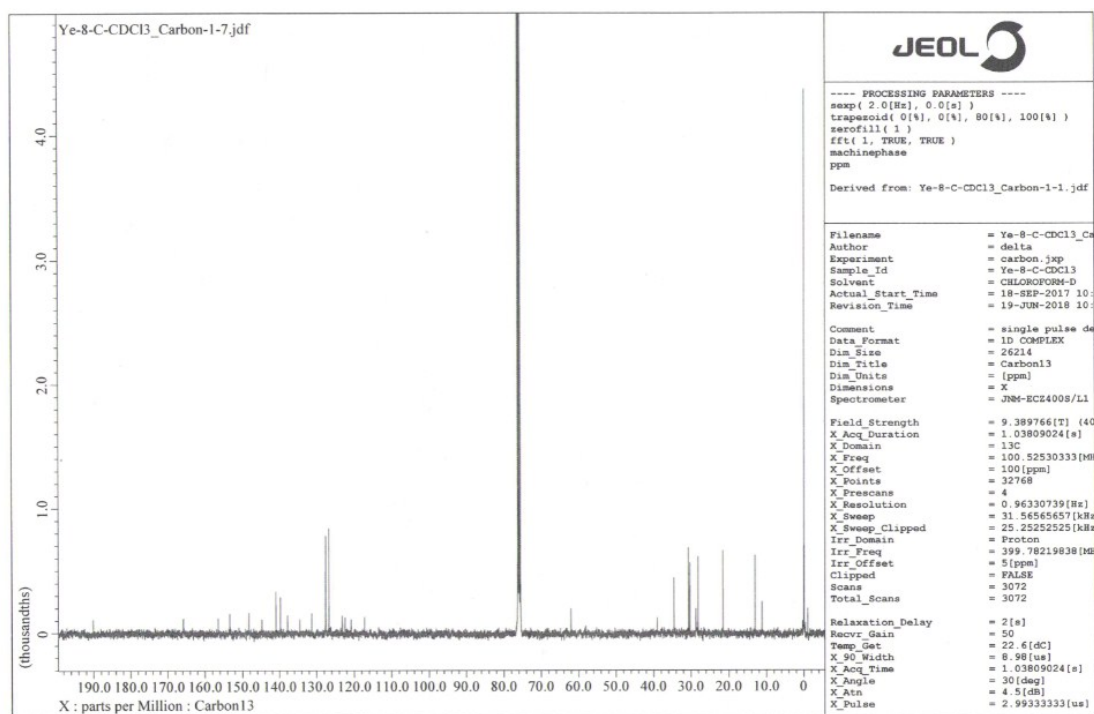

**Fig. S11.**  $^{13}\text{C}$  NMR (100 MHz,  $\text{CDCl}_3$ ) spectra of compound P-IDTzR.

## Reference.

1. Q. Zhang, B. Kan, F. Liu, G. Long, X. Wan, X. Chen, Y. Zuo, W. Ni, H. Zhang, M. Li, Z. Hu, F. Huang, Y. Cao, Z. Liang, M. Zhang, T. P. Russell and Y. Chen, *Nat. Photonics*, 2015, **9**, 35-41.
2. P. Ye, Y. Chen, J. Wu, X. Wu, S. Yu, W. Xing, Q. Liu, X. Jia, A. Peng and H. Huang, *J. Mater. Chem. C*, 2017, **5**, 12591-12596.
